# Supplementary material for: Molecular Evolutionary Analyses of the RNA-Dependent RNA Polymerase (RdRp) Region and VP1 Gene in Human Norovirus Genotypes GII.P6-GII.6 and GII.P7-GII.6
Source: MDPI journal article supplement (doi:10.3390/v15071497), 2023-07-01
Supplement: s1 [file s1]

Table S2. Parameters used in the Bayesian Marcov chain Monte Carlo (MCMC) analyses of the present HuNoV GII.6 strains.

|                                                                                        | Substitution<br>Models | Ganma<br>shape | Proportion<br>invariant | Clock Models                 | Demographic Models                   | Chain Length  | Log Every |
|----------------------------------------------------------------------------------------|------------------------|----------------|-------------------------|------------------------------|--------------------------------------|---------------|-----------|
| All <i>RdRp</i> regions (141 strains)<br>P6-type 15 strains;<br>P7-type 126 strains    | SYM+G                  | 0.2            | -                       | Relaxed Clock<br>Exponential | Coalescent Exponential<br>Population | 400,000,000   | 8,000     |
| P6-type <i>RdRp</i> region (15 strains)                                                | TPM2+I                 | -              | 0.792                   | Relaxed Clock<br>Exponential | Coalescent Exponential<br>Population | 6,000,000,000 | 40,000    |
| P7-type <i>RdRp</i> region (126 strains)                                               | TPM2+G                 | 0.242          | 0.082                   | Relaxed Clock<br>Exponential | Coalescent Constant<br>Population    | 400,000,000   | 8,000     |
| ALL GII.6 <i>VP1</i> genes (141 strains)<br>P6-type 15 strains;<br>P7-type 126 strains | SYM+I+G                | 1.358          | 0.524                   | Relaxed Clock<br>Exponential | Coalescent Exponential<br>Population | 400,000,000   | 8,000     |
| GII.P6-GII.6 <i>VP1</i> gene (15 strains)                                              | SYM+G                  | 0.025          | -                       | Relaxed Clock<br>Exponential | Coalescent Constant<br>Population    | 400,000,000   | 8,000     |
| GII. P7-GII.6 <i>VP1</i> gene (126 strains)                                            | SYM+I+G                | 1.334          | 0.518                   | Relaxed Clock<br>Exponential | Coalescent Constant<br>Population    | 400,000,000   | 8,000     |
