# Supplementary material for: Molecular Evolutionary Analyses of the RNA-Dependent RNA Polymerase (RdRp) Region and VP1 Gene in Human Norovirus Genotypes GII.P6-GII.6 and GII.P7-GII.6
Source: MDPI journal article supplement (doi:10.3390/v15071497), 2023-07-01
Supplement: s1 [file s1]

Table S1. List of GII.P6-GII.6 and GII.P7-GII.6 strains used in this study.

| GenBank<br>Accession No. | strain                         | Isolated/colle<br>cted year | Country/ <a href="#">region</a>    | polymerase<br>type |
|--------------------------|--------------------------------|-----------------------------|------------------------------------|--------------------|
| JX846927                 | JX846927.1_Norovirus_HuGII.6CH | 1984                        | USA                                | GII.P7             |
| AB039778                 | AB039778.1_Norwalk-like_virus_ | 1997                        | <a href="#">Japan/</a> Saitama U16 | GII.P6             |
| AB039779                 | AB039779.1_Norwalk-like_virus_ | 1997                        | <a href="#">Japan/</a> Saitama U17 | GII.P6             |
| AB039776                 | AB039776.1_Norwalk-like_virus_ | 1997                        | <a href="#">Japan/</a> Saitama U3  | GII.P7             |
| AB039777                 | AB039777.1_Norwalk-like_virus_ | 1997                        | <a href="#">Japan/</a> Saitama U4  | GII.P7             |
| GU930737                 | GU930737.1_Norwalk-like_virus_ | 1997                        | USA: Texas                         | GII.P7             |
| LC122923                 | GII.6-GII.P6HI-1Nov2004_2004   | 2004                        | <a href="#">Japan/</a> Hiroshima   | GII.P6             |
| LC122924                 | GII.6-GII.P6TO-59Nov2003_2003  | 2003                        | <a href="#">Japan/</a> Tochigi     | GII.P6             |
| LC122928                 | GII.6-GII.P6TO-60Sep2003_2003  | 2003                        | <a href="#">Japan/</a> Tochigi     | GII.P6             |
| LC122925                 | GII.6-GII.P6TO-61Oct2003_2003  | 2003                        | <a href="#">Japan/</a> Tochigi     | GII.P6             |
| LC122933                 | GII.6-GII.P6TO-62Oct2003_2003  | 2003                        | <a href="#">Japan/</a> Tochigi     | GII.P6             |
| LC122926                 | GII.6-GII.P6TO-63Oct2003_2003  | 2003                        | <a href="#">Japan/</a> Tochigi     | GII.P6             |
| LC122931                 | GII.6-GII.P6TO-64Oct2003_2003  | 2003                        | <a href="#">Japan/</a> Tochigi     | GII.P6             |
| LC122929                 | GII.6-GII.P6TO-65Oct2003_2003  | 2003                        | <a href="#">Japan/</a> Tochigi     | GII.P6             |
| LC122930                 | GII.6-GII.P6TO-66Nov2003_2003  | 2003                        | <a href="#">Japan/</a> Tochigi     | GII.P6             |
| LC122932                 | GII.6-GII.P6TO-68Dec2003_2003  | 2003                        | <a href="#">Japan/</a> Tochigi     | GII.P6             |
| LC760142                 | GII.6-GII.P6TO-71Dec2003_2003  | 2003                        | <a href="#">Japan/</a> Tochigi     | GII.P6             |
| LC122921                 | GII.6-GII.P7TO-52Apr2003_2003  | 2003                        | <a href="#">Japan/</a> Tochigi     | GII.P7             |
| LC122922                 | GII.6-GII.P7TO-53Apr2003_2003  | 2003                        | <a href="#">Japan/</a> Tochigi     | GII.P7             |
| LC122919                 | GII.6-GII.P7HO-33Mar2004_2004  | 2004                        | <a href="#">Japan/</a> Hokkaido    | GII.P7             |
| LC122920                 | GII.6-GII.P7HO-34Nov2004_2004  | 2004                        | <a href="#">Japan/</a> Hokkaido    | GII.P7             |
| LC122917                 | GII.6-GII.P7HO-35Dec2005_2005  | 2005                        | <a href="#">Japan/</a> Hokkaido    | GII.P7             |
| LC760178                 | GII.6-GII.P7TO-1022005_2005    | 2005                        | <a href="#">Japan/</a> Tochigi     | GII.P7             |
| LC760177                 | GII.6-GII.P7TO-1072005_2005    | 2005                        | <a href="#">Japan/</a> Tochigi     | GII.P7             |
| LC760176                 | GII.6-GII.P7TO-1152005_2005    | 2005                        | <a href="#">Japan/</a> Tochigi     | GII.P7             |
| LC122918                 | GII.6-GII.P7YA-017Feb2005_2005 | 2005                        | <a href="#">Japan/</a> Yamaguchi   | GII.P7             |
| LC760179                 | GII.6-GII.P7HI-142008_2008     | 2008                        | <a href="#">Japan/</a> Hiroshima   | GII.P7             |
| LC122893                 | GII.6-GII.P7HO-37Dec2008_2008  | 2008                        | <a href="#">Japan/</a> Hokkaido    | GII.P7             |
| LC122894                 | GII.6-GII.P7SA-74Dec2008_2008  | 2008                        | <a href="#">Japan/</a> Saitama     | GII.P7             |
| LC122895                 | GII.6-GII.P7SA-75Dec2008_2008  | 2008                        | <a href="#">Japan/</a> Saitama     | GII.P7             |
| LC760144                 | GII.6-GII.P7EH-532009_2009     | 2009                        | <a href="#">Japan/</a> Ehime       | GII.P7             |
| LC122892                 | GII.6-GII.P7EH-54June2009_2009 | 2009                        | <a href="#">Japan/</a> Ehime       | GII.P7             |
| LC122896                 | GII.6-GII.P7HO-38Oct2009_2009  | 2009                        | <a href="#">Japan/</a> Hokkaido    | GII.P7             |
| LC760174                 | GII.6-GII.P7KA-562009_2009     | 2009                        | <a href="#">Japan/</a> Kanagawa    | GII.P7             |

| GenBank<br>Accession No. | strain                         | Isolated/colle<br>cted year | Country/ <a href="#">region</a>  | polymerase<br>type |
|--------------------------|--------------------------------|-----------------------------|----------------------------------|--------------------|
| KM198498                 | KM198498.1_Norovirus_HuGII2008 | 2009                        | Viet Nam                         | GII.P7             |
| KM198531                 | KM198531.1_Norovirus_HuGII3011 | 2009                        | Viet Nam                         | GII.P7             |
| KX752057                 | KX752057.1_Norovirus_GIIHuChin | 2009                        | China                            | GII.P7             |
| KJ407072                 | KJ407072.2_Norovirus_HuGII.6HS | 2010                        | USA                              | GII.P7             |
| KM198530                 | KM198530.1_Norovirus_HuGII2048 | 2010                        | Viet Nam                         | GII.P7             |
| KM198534                 | KM198534.1_Norovirus_HuGII3044 | 2010                        | Viet Nam                         | GII.P7             |
| KM198549                 | KM198549.1_Norovirus_HuGII3047 | 2010                        | Viet Nam                         | GII.P7             |
| LC122897                 | GII.6-GII.P7YA-5Nov2011_2011   | 2011                        | <a href="#">Japan/</a> Yamaguchi | GII.P7             |
| LC760145                 | GII.6-GII.P7KA-52012_2012      | 2012                        | <a href="#">Japan/</a> Kanagawa  | GII.P7             |
| LC760175                 | GII.6-GII.P7SA-1382012_2012    | 2012                        | <a href="#">Japan/</a> Saitama   | GII.P7             |
| KY424341                 | KY424341.1_Norovirus_GII.6_iso | 2012                        | USA                              | GII.P7             |
| KY424342                 | KY424342.1_Norovirus_GII.6_iso | 2012                        | USA                              | GII.P7             |
| KY424343                 | KY424343.1_Norovirus_GII.6_iso | 2012                        | USA                              | GII.P7             |
| KY424344                 | KY424344.1_Norovirus_GII.6_iso | 2012                        | USA                              | GII.P7             |
| LC122891                 | GII.6-GII.7MI-27Jul2013_2013   | 2013                        | <a href="#">Japan/</a> Miyagi    | GII.P7             |
| LC122901                 | GII.6-GII.7MI-28Dec2013_2013   | 2013                        | <a href="#">Japan/</a> Miyagi    | GII.P7             |
| LC760143                 | GII.6-GII.P7EH-172013_2013     | 2013                        | <a href="#">Japan/</a> Ehime     | GII.P7             |
| LC122916                 | GII.6-GII.P7EH-55Jan2013_2013  | 2013                        | <a href="#">Japan/</a> Ehime     | GII.P7             |
| LC122915                 | GII.6-GII.P7HI-28Nov2013_2013  | 2013                        | <a href="#">Japan/</a> Hiroshima | GII.P7             |
| LC122898                 | GII.6-GII.P7HI-29Dec2013_2013  | 2013                        | <a href="#">Japan/</a> Hiroshima | GII.P7             |
| LC760146                 | GII.6-GII.P7KA-572013_2013     | 2013                        | <a href="#">Japan/</a> Kanagawa  | GII.P7             |
| LC760147                 | GII.6-GII.P7KA-582013_2013     | 2013                        | <a href="#">Japan/</a> Kanagawa  | GII.P7             |
| LC760171                 | GII.6-GII.P7KA-62013_2013      | 2013                        | <a href="#">Japan/</a> Kanagawa  | GII.P7             |
| LC760172                 | GII.6-GII.P7KA-72013_2013      | 2013                        | <a href="#">Japan/</a> Kanagawa  | GII.P7             |
| LC760157                 | GII.6-GII.P7OS-1082013_2013    | 2013                        | Japan                            | GII.P7             |
| LC760158                 | GII.6-GII.P7OS-1102013_2013    | 2013                        | Japan                            | GII.P7             |
| LC760165                 | GII.6-GII.P7SA-1402013_2013    | 2013                        | <a href="#">Japan/</a> Saitama   | GII.P7             |
| LC760168                 | GII.6-GII.P7YA-122013_2013     | 2013                        | <a href="#">Japan/</a> Yamaguchi | GII.P7             |
| KM267740                 | KM267740.1_Norovirus_GII_isola | 2013                        | Taiwan                           | GII.P7             |
| KM267742                 | KM267742.1_Norovirus_GII_isola | 2013                        | Taiwan                           | GII.P7             |
| KM267743                 | KM267743.1_Norovirus_GII_isola | 2013                        | Taiwan                           | GII.P7             |
| MF140676                 | MF140676.1_Norovirus_GII_strai | 2013                        | Netherlands                      | GII.P7             |
| MF140677                 | MF140677.1_Norovirus_GII_strai | 2013                        | Netherlands                      | GII.P7             |
| LC122908                 | GII.6-GII.7MI-29Jan2014_2014   | 2014                        | <a href="#">Japan/</a> Miyagi    | GII.P7             |
| LC122909                 | GII.6-GII.P7EH-18Jan2014_2014  | 2014                        | <a href="#">Japan/</a> Ehime     | GII.P7             |

| GenBank<br>Accession No. | strain                         | Isolated/colle<br>cted year | Country/ <a href="#">region</a>  | polymerase<br>type |
|--------------------------|--------------------------------|-----------------------------|----------------------------------|--------------------|
| LC122910                 | GII.6-GII.P7EH-19Apr2014_2014  | 2014                        | <a href="#">Japan/</a> Ehime     | GII.P7             |
| LC122900                 | GII.6-GII.P7HI-33Mar2014_2014  | 2014                        | <a href="#">Japan/</a> Hiroshima | GII.P7             |
| LC122899                 | GII.6-GII.P7HI-34Mar2014_2014  | 2014                        | <a href="#">Japan/</a> Hiroshima | GII.P7             |
| LC122903                 | GII.6-GII.P7HI-35Apr2014_2014  | 2014                        | <a href="#">Japan/</a> Hiroshima | GII.P7             |
| LC122912                 | GII.6-GII.P7HI-36Apr2014_2014  | 2014                        | <a href="#">Japan/</a> Hiroshima | GII.P7             |
| LC122904                 | GII.6-GII.P7HI-37May2014_2014  | 2014                        | <a href="#">Japan/</a> Hiroshima | GII.P7             |
| LC122905                 | GII.6-GII.P7HI-38May2014_2014  | 2014                        | <a href="#">Japan/</a> Hiroshima | GII.P7             |
| LC122906                 | GII.6-GII.P7HI-39Jun2014_2014  | 2014                        | <a href="#">Japan/</a> Hiroshima | GII.P7             |
| LC122911                 | GII.6-GII.P7HO-39Jun2014_2014  | 2014                        | <a href="#">Japan/</a> Hokkaido  | GII.P7             |
| LC122902                 | GII.6-GII.P7KA-16Jan2014_2014  | 2014                        | <a href="#">Japan/</a> Kanagawa  | GII.P7             |
| LC122907                 | GII.6-GII.P7KA-17Feb2014_2014  | 2014                        | <a href="#">Japan/</a> Kanagawa  | GII.P7             |
| LC760148                 | GII.6-GII.P7KA-592014_2014     | 2014                        | <a href="#">Japan/</a> Kanagawa  | GII.P7             |
| LC760149                 | GII.6-GII.P7KA-812014_2014     | 2014                        | <a href="#">Japan/</a> Kanagawa  | GII.P7             |
| LC760150                 | GII.6-GII.P7MI-672014_2014     | 2014                        | <a href="#">Japan/</a> Miyagi    | GII.P7             |
| LC670151                 | GII.6-GII.P7MI-682014_2014     | 2014                        | <a href="#">Japan/</a> Miyagi    | GII.P7             |
| HQ169542                 | HQ169542.2_Norovirus_HuGII.618 | 2005                        | USA                              | GII.P6             |
| LC670152                 | GII.6-GII.P7MI-692014_2014     | 2014                        | <a href="#">Japan/</a> Miyagi    | GII.P7             |
| JX989075                 | JX989075.1_Norovirus_HuGII.6GZ | 2011                        | China                            | GII.P6             |
| LC670153                 | GII.6-GII.P7MI-702014_2014     | 2014                        | <a href="#">Japan/</a> Miyagi    | GII.P7             |
| LC670154                 | GII.6-GII.P7MI-712014_2014     | 2014                        | <a href="#">Japan/</a> Miyagi    | GII.P7             |
| LC670155                 | GII.6-GII.P7MI-732014_2014     | 2014                        | <a href="#">Japan/</a> Miyagi    | GII.P7             |
| LC670156                 | GII.6-GII.P7MI-742014_2014     | 2014                        | <a href="#">Japan/</a> Miyagi    | GII.P7             |
| LC670159                 | GII.6-GII.P7OS-1112014_2014    | 2014                        | Japan                            | GII.P7             |
| LC670160                 | GII.6-GII.P7OS-1132014_2014    | 2014                        | Japan                            | GII.P7             |
| LC670161                 | GII.6-GII.P7OS-1142014_2014    | 2014                        | Japan                            | GII.P7             |
| LC670162                 | GII.6-GII.P7OS-1322014_2014    | 2014                        | Japan                            | GII.P7             |
| LC670163                 | GII.6-GII.P7OS-2282014_2014    | 2014                        | Japan                            | GII.P7             |
| LC670164                 | GII.6-GII.P7OS-2482014_2014    | 2014                        | Japan                            | GII.P7             |
| LC760166                 | GII.6-GII.P7SA-1412014_2014    | 2014                        | <a href="#">Japan/</a> Saitama   | GII.P7             |
| LC122914                 | GII.6-GII.P7SH-5Jan2014_2014   | 2014                        | <a href="#">Japan/</a> Shizuoka  | GII.P7             |
| LC122913                 | GII.6-GII.P7SH-6Feb2014_2014   | 2014                        | <a href="#">Japan/</a> Shizuoka  | GII.P7             |
| LC760169                 | GII.6-GII.P7TO-1252014_2014    | 2014                        | <a href="#">Japan/</a> Tochigi   | GII.P7             |
| LC760170                 | GII.6-GII.P7TO-1272014_2014    | 2014                        | <a href="#">Japan/</a> Tochigi   | GII.P7             |
| KM036373                 | KM036373.1_Norovirus_HuGII.P7G | 2014                        | Taiwan                           | GII.P7             |
| KX268709                 | KX268709.1_Norovirus_HuGII.P7_ | 2014                        | USA                              | GII.P7             |

| GenBank<br>Accession No. | strain                         | Isolated/colle<br>cted year | Country/ <a href="#">region</a> | polymerase<br>type |
|--------------------------|--------------------------------|-----------------------------|---------------------------------|--------------------|
| MF140678                 | MF140678.1_Norovirus_GII_strai | 2014                        | Netherlands                     | GII.P7             |
| MF140679                 | MF140679.1_Norovirus_GII_strai | 2014                        | Netherlands                     | GII.P7             |
| MF140680                 | MF140680.1_Norovirus_GII_strai | 2014                        | Netherlands                     | GII.P7             |
| MH218639                 | MH218639.1_Norovirus_GII_isola | 2014                        | United Kingdom                  | GII.P7             |
| MH702288                 | MH702288.1_Norovirus_GII_strai | 2014                        | Bhutan                          | GII.P7             |
| MK907786                 | MK907786.1_Norovirus_GII_isola | 2014                        | France/ Nantes                  | GII.P7             |
| MK907789                 | MK907789.1_Norovirus_GII_isola | 2014                        | France/ Nantes                  | GII.P7             |
| LC760173                 | GII.6-GII.P7MI-752015_2015     | 2015                        | Japan/ Miyagi                   | GII.P7             |
| LC760167                 | GII.6-GII.P7SA-1422015_2015    | 2015                        | Japan/ Saitama                  | GII.P7             |
| KU935739                 | KU935739.1_Norovirus_GII_isola | 2015                        | China                           | GII.P7             |
| KX158281                 | KX158281.1_Norovirus_GII_strai | 2015                        | Canada                          | GII.P7             |
| MG571778                 | MG571778.1_Norovirus_GII.6_clo | 2015                        | Venezuela                       | GII.P7             |
| MH218640                 | MH218640.1_Norovirus_GII_isola | 2015                        | United Kingdom                  | GII.P7             |
| MH218641                 | MH218641.1_Norovirus_GII_isola | 2015                        | United Kingdom                  | GII.P7             |
| MH218642                 | MH218642.1_Norovirus_GII_isola | 2015                        | United Kingdom                  | GII.P7             |
| MH218643                 | MH218643.1_Norovirus_GII_isola | 2015                        | United Kingdom                  | GII.P7             |
| MH218644                 | MH218644.1_Norovirus_GII_isola | 2015                        | United Kingdom                  | GII.P7             |
| MH218645                 | MH218645.1_Norovirus_GII_isola | 2015                        | United Kingdom                  | GII.P7             |
| MH218650                 | MH218650.1_Norovirus_GII_isola | 2015                        | United Kingdom                  | GII.P7             |
| MH218666                 | MH218666.1_Norovirus_GII_isola | 2015                        | United Kingdom                  | GII.P7             |
| MH218667                 | MH218667.1_Norovirus_GII_isola | 2015                        | United Kingdom                  | GII.P7             |
| MH218673                 | MH218673.1_Norovirus_GII_isola | 2015                        | United Kingdom                  | GII.P7             |
| MH218719                 | MH218719.1_Norovirus_GII_isola | 2015                        | United Kingdom                  | GII.P7             |
| MN248514                 | MN248514.1_Norovirus_GII_isola | 2015                        | Belgium                         | GII.P7             |
| NC_040876                | NC_040876.1_Norovirus_GII.P7_G | 2015                        | United Kingdom                  | GII.P7             |
| MF802550                 | MF802550.1_Norovirus_GII_isola | 2016                        | China/ Nanjing                  | GII.P7             |
| MG557654                 | MG557654.1_Norovirus_GII_isola | 2016                        | Ethiopia                        | GII.P7             |
| MH218687                 | MH218687.1_Norovirus_GII_isola | 2016                        | United Kingdom                  | GII.P7             |
| MH702284                 | MH702284.1_Norovirus_GII_strai | 2016                        | Cambodia                        | GII.P7             |
| MH702286                 | MH702286.1_Norovirus_GII_strai | 2016                        | Cambodia                        | GII.P7             |
| MH260487                 | MH260487.1_Norovirus_GII_isola | 2017                        | USA                             | GII.P7             |
| MH260510                 | MH260510.1_Norovirus_GII_isola | 2017                        | USA                             | GII.P7             |
| MH279824                 | MH279824.1_Norovirus_GII_strai | 2017                        | USA                             | GII.P7             |
| MH791993                 | MH791993.1_Norovirus_GII_isola | 2017                        | USA                             | GII.P7             |
| MK301293                 | MK301293.1_Norovirus_GII_isola | 2018                        | USA                             | GII.P7             |

| GenBank<br>Accession No. | strain                         | Isolated/colle<br>cted year | Country/ <a href="#">region</a> | polymerase<br>type |
|--------------------------|--------------------------------|-----------------------------|---------------------------------|--------------------|
| MK956198                 | MK956198.1_Norovirus_GII_isola | 2018                        | France/ <a href="#">Nantes</a>  | GII.P7             |
| MK956199                 | MK956199.1_Norovirus_GII_isola | 2018                        | France/ <a href="#">Nantes</a>  | GII.P7             |
