# Supplementary material for: Molecular Evolutionary Analyses of the RNA-Dependent RNA Polymerase (RdRp) Region and VP1 Gene in Human Norovirus Genotypes GII.P6-GII.6 and GII.P7-GII.6
Source: MDPI journal article supplement (doi:10.3390/v15071497), 2023-07-01
Supplement: s1 [file s1]

Table S4. Detailed of the amino acid sequence of the *VP1* gene for the representative and prototype strains of each cluster in this study. Blue areas show conformational epitopes and green areas show Protruding 2 domain (aa279 to 406). The yellow boxes show positive selection sites.

|              | 1  | 2  | 3  | 4  | 5  | 6  | 7  | 8  | 9  | 10  | 11  | 12  | 13  | 14  | 15  | 16  | 17  | 18  | 19  | 20  | 21  | 22  | 23  | 24  | 25  | 26  | 27  | 28  | 29  | 30  |
|--------------|----|----|----|----|----|----|----|----|----|-----|-----|-----|-----|-----|-----|-----|-----|-----|-----|-----|-----|-----|-----|-----|-----|-----|-----|-----|-----|-----|
| AB039777(P7) | M  | K  | M  | A  | S  | N  | D  | A  | A  | P   | S   | N   | D   | G   | A   | A   | N   | L   | V   | P   | E   | A   | N   | N   | E   | V   | M   | A   | L   | E   |
| LC122916(P7) | M  | K  | M  | A  | S  | N  | D  | A  | A  | P   | S   | N   | D   | G   | A   | A   | N   | L   | V   | P   | E   | A   | N   | N   | E   | V   | M   | A   | L   | E   |
| MK956199(P7) | M  | K  | M  | A  | S  | N  | D  | A  | A  | P   | S   | N   | D   | G   | A   | A   | N   | L   | V   | P   | E   | A   | N   | N   | E   | V   | M   | A   | L   | E   |
| MH791993(P7) | M  | K  | M  | A  | S  | N  | D  | A  | A  | P   | S   | N   | D   | G   | A   | A   | N   | L   | V   | P   | E   | A   | T   | N   | E   | V   | M   | A   | L   | E   |
| JX989075(P6) | M  | K  | M  | A  | S  | N  | D  | A  | A  | P   | S   | N   | D   | G   | A   | A   | N   | L   | V   | P   | E   | A   | N   | N   | E   | V   | M   | A   | L   | E   |
|              | 31 | 32 | 33 | 34 | 35 | 36 | 37 | 38 | 39 | 40  | 41  | 42  | 43  | 44  | 45  | 46  | 47  | 48  | 49  | 50  | 51  | 52  | 53  | 54  | 55  | 56  | 57  | 58  | 59  | 60  |
| AB039777(P7) | P  | V  | V  | G  | A  | S  | I  | A  | A  | P   | V   | V   | G   | Q   | Q   | N   | I   | I   | D   | P   | W   | I   | R   | E   | N   | F   | V   | Q   | A   | P   |
| LC122916(P7) | P  | V  | V  | G  | A  | S  | I  | A  | A  | P   | V   | V   | G   | Q   | Q   | N   | I   | I   | D   | P   | W   | I   | R   | E   | N   | F   | V   | Q   | A   | P   |
| MK956199(P7) | P  | V  | V  | G  | A  | S  | I  | A  | A  | P   | V   | V   | G   | Q   | Q   | N   | I   | I   | D   | P   | W   | I   | R   | E   | N   | F   | V   | Q   | A   | P   |
| MH791993(P7) | P  | V  | V  | G  | A  | S  | I  | A  | A  | P   | V   | V   | G   | Q   | Q   | N   | I   | I   | D   | P   | W   | I   | R   | E   | N   | F   | V   | Q   | A   | P   |
| JX989075(P6) | P  | V  | V  | G  | A  | S  | I  | A  | A  | P   | V   | V   | G   | Q   | Q   | N   | I   | I   | D   | P   | W   | I   | R   | E   | N   | F   | V   | Q   | A   | P   |
|              | 61 | 62 | 63 | 64 | 65 | 66 | 67 | 68 | 69 | 70  | 71  | 72  | 73  | 74  | 75  | 76  | 77  | 78  | 79  | 80  | 81  | 82  | 83  | 84  | 85  | 86  | 87  | 88  | 89  | 90  |
| AB039777(P7) | Q  | G  | E  | F  | T  | V  | S  | P  | R  | N   | S   | P   | G   | E   | M   | L   | L   | N   | L   | E   | L   | G   | P   | E   | L   | N   | P   | Y   | L   | S   |
| LC122916(P7) | Q  | G  | E  | F  | T  | V  | S  | P  | R  | N   | S   | P   | G   | E   | M   | L   | L   | N   | L   | E   | L   | G   | P   | E   | L   | N   | P   | Y   | L   | S   |
| MK956199(P7) | Q  | G  | E  | F  | T  | V  | S  | P  | R  | N   | S   | P   | G   | E   | M   | L   | L   | N   | L   | E   | L   | G   | P   | E   | L   | N   | P   | Y   | L   | S   |
| MH791993(P7) | Q  | G  | E  | F  | T  | V  | S  | P  | R  | N   | S   | P   | G   | E   | M   | L   | L   | N   | L   | E   | L   | G   | P   | E   | L   | N   | P   | Y   | L   | G   |
| JX989075(P6) | Q  | G  | E  | F  | T  | V  | S  | P  | R  | N   | S   | P   | G   | E   | M   | L   | L   | N   | L   | E   | L   | G   | P   | E   | L   | N   | P   | Y   | L   | S   |
|              | 91 | 92 | 93 | 94 | 95 | 96 | 97 | 98 | 99 | 100 | 101 | 102 | 103 | 104 | 105 | 106 | 107 | 108 | 109 | 110 | 111 | 112 | 113 | 114 | 115 | 116 | 117 | 118 | 119 | 120 |
| AB039777(P7) | H  | L  | S  | P  | M  | Y  | N  | G  | Y  | A   | G   | G   | M   | Q   | V   | Q   | V   | V   | L   | A   | G   | N   | A   | F   | T   | A   | G   | K   | I   | I   |
| LC122916(P7) | H  | L  | S  | R  | M  | Y  | N  | G  | Y  | A   | G   | G   | M   | Q   | V   | Q   | V   | V   | L   | A   | G   | N   | A   | F   | T   | A   | G   | K   | I   | I   |

|              |     |     |     |     |     |     |     |     |     |     |     |     |     |     |     |     |     |     |     |     |     |     |     |     |     |     |     |     |     |     |
|--------------|-----|-----|-----|-----|-----|-----|-----|-----|-----|-----|-----|-----|-----|-----|-----|-----|-----|-----|-----|-----|-----|-----|-----|-----|-----|-----|-----|-----|-----|-----|
| MK956199(P7) | H   | L   | S   | R   | M   | Y   | N   | G   | Y   | A   | G   | G   | M   | Q   | V   | Q   | V   | V   | L   | A   | G   | N   | A   | F   | T   | A   | G   | K   | I   | I   |
| MH791993(P7) | H   | L   | S   | R   | M   | Y   | N   | G   | Y   | A   | G   | G   | M   | Q   | V   | Q   | V   | V   | L   | A   | G   | N   | A   | F   | T   | A   | G   | K   | I   | I   |
| JX989075(P6) | H   | L   | S   | R   | M   | Y   | N   | G   | Y   | A   | G   | G   | M   | Q   | V   | Q   | V   | V   | L   | A   | G   | N   | A   | F   | T   | A   | G   | K   | I   | I   |
|              | 121 | 122 | 123 | 124 | 125 | 126 | 127 | 128 | 129 | 130 | 131 | 132 | 133 | 134 | 135 | 136 | 137 | 138 | 139 | 140 | 141 | 142 | 143 | 144 | 145 | 146 | 147 | 148 | 149 | 150 |
| AB039777(P7) | F   | A   | A   | V   | P   | P   | H   | F   | P   | V   | D   | N   | I   | S   | A   | A   | Q   | I   | T   | M   | C   | P   | H   | V   | I   | V   | D   | V   | R   | Q   |
| LC122916(P7) | F   | A   | A   | V   | P   | P   | H   | F   | P   | V   | D   | N   | I   | S   | A   | A   | Q   | I   | T   | M   | C   | P   | H   | V   | I   | V   | D   | V   | R   | Q   |
| MK956199(P7) | F   | A   | A   | V   | P   | P   | H   | F   | P   | V   | E   | N   | I   | S   | A   | A   | Q   | I   | T   | M   | C   | P   | H   | V   | I   | V   | D   | V   | R   | Q   |
| MH791993(P7) | F   | A   | A   | V   | P   | P   | H   | F   | P   | V   | E   | N   | I   | S   | A   | A   | Q   | I   | T   | M   | C   | P   | H   | V   | I   | V   | D   | V   | R   | Q   |
| JX989075(P6) | F   | A   | A   | V   | P   | P   | H   | F   | P   | V   | E   | N   | I   | S   | A   | A   | Q   | I   | T   | M   | C   | P   | H   | V   | I   | V   | D   | V   | R   | Q   |
|              | 151 | 152 | 153 | 154 | 155 | 156 | 157 | 158 | 159 | 160 | 161 | 162 | 163 | 164 | 165 | 166 | 167 | 168 | 169 | 170 | 171 | 172 | 173 | 174 | 175 | 176 | 177 | 178 | 179 | 180 |
| AB039777(P7) | L   | E   | P   | V   | P   | L   | P   | L   | P   | D   | I   | R   | N   | R   | F   | F   | H   | Y   | N   | Q   | E   | N   | T   | P   | R   | M   | R   | L   | V   | A   |
| LC122916(P7) | L   | E   | P   | V   | L   | L   | P   | L   | P   | D   | I   | R   | N   | R   | F   | F   | H   | Y   | N   | Q   | E   | D   | T   | P   | R   | M   | R   | L   | V   | A   |
| MK956199(P7) | L   | E   | P   | V   | L   | L   | P   | L   | P   | D   | I   | R   | N   | R   | F   | F   | H   | Y   | N   | Q   | E   | N   | T   | P   | R   | M   | R   | L   | V   | A   |
| MH791993(P7) | L   | E   | P   | V   | L   | L   | P   | L   | P   | D   | I   | R   | N   | R   | F   | F   | H   | Y   | N   | Q   | E   | N   | T   | P   | R   | M   | R   | L   | V   | A   |
| JX989075(P6) | L   | E   | P   | V   | L   | L   | P   | L   | P   | D   | I   | R   | N   | R   | F   | F   | H   | Y   | N   | Q   | E   | D   | T   | P   | R   | M   | R   | L   | V   | A   |
|              | 181 | 182 | 183 | 184 | 185 | 186 | 187 | 188 | 189 | 190 | 191 | 192 | 193 | 194 | 195 | 196 | 197 | 198 | 199 | 200 | 201 | 202 | 203 | 204 | 205 | 206 | 207 | 208 | 209 | 210 |
| AB039777(P7) | M   | L   | Y   | T   | P   | L   | R   | A   | N   | S   | G   | E   | D   | V   | F   | T   | V   | S   | C   | R   | V   | L   | T   | R   | P   | A   | P   | D   | F   | E   |
| LC122916(P7) | M   | L   | Y   | T   | P   | L   | R   | A   | N   | S   | G   | E   | D   | V   | F   | T   | V   | S   | C   | R   | V   | L   | T   | R   | P   | A   | P   | D   | F   | E   |
| MK956199(P7) | M   | L   | Y   | T   | P   | L   | R   | A   | N   | S   | G   | E   | D   | V   | F   | T   | V   | S   | C   | R   | V   | L   | T   | R   | P   | A   | P   | D   | F   | E   |
| MH791993(P7) | M   | L   | Y   | T   | P   | L   | R   | A   | N   | S   | G   | E   | D   | V   | F   | T   | V   | S   | C   | R   | V   | L   | T   | R   | P   | A   | P   | D   | F   | E   |
| JX989075(P6) | M   | L   | Y   | T   | P   | L   | R   | A   | N   | S   | G   | E   | D   | V   | F   | T   | V   | S   | C   | R   | V   | L   | T   | R   | P   | A   | P   | D   | F   | E   |
|              | 211 | 212 | 213 | 214 | 215 | 216 | 217 | 218 | 219 | 220 | 221 | 222 | 223 | 224 | 225 | 226 | 227 | 228 | 229 | 230 | 231 | 232 | 233 | 234 | 235 | 236 | 237 | 238 | 239 | 240 |
| AB039777(P7) | F   | T   | F   | L   | V   | P   | P   | T   | V   | E   | S   | K   | T   | K   | P   | F   | T   | L   | P   | I   | L   | T   | L   | G   | E   | L   | S   | N   | S   | R   |
| LC122916(P7) | F   | T   | F   | L   | V   | P   | P   | T   | V   | E   | S   | K   | T   | K   | P   | F   | T   | L   | P   | I   | L   | T   | L   | G   | E   | L   | S   | N   | S   | R   |

|              |     |     |     |     |     |     |     |     |     |     |     |     |     |     |     |     |     |     |     |     |     |     |     |     |     |     |     |     |     |     |
|--------------|-----|-----|-----|-----|-----|-----|-----|-----|-----|-----|-----|-----|-----|-----|-----|-----|-----|-----|-----|-----|-----|-----|-----|-----|-----|-----|-----|-----|-----|-----|
| MK956199(P7) | F   | T   | F   | L   | V   | P   | P   | T   | V   | E   | S   | K   | T   | K   | P   | F   | T   | L   | P   | I   | L   | T   | L   | G   | E   | L   | S   | N   | S   | R   |
| MH791993(P7) | F   | T   | F   | L   | V   | P   | P   | T   | V   | E   | S   | K   | T   | K   | P   | F   | T   | L   | P   | I   | L   | T   | L   | G   | E   | L   | S   | N   | S   | R   |
| JX989075(P6) | F   | T   | F   | L   | V   | P   | P   | T   | V   | E   | S   | K   | T   | K   | P   | F   | T   | L   | P   | I   | L   | T   | L   | G   | E   | L   | S   | N   | S   | R   |
|              | 241 | 242 | 243 | 244 | 245 | 246 | 247 | 248 | 249 | 250 | 251 | 252 | 253 | 254 | 255 | 256 | 257 | 258 | 259 | 260 | 261 | 262 | 263 | 264 | 265 | 266 | 267 | 268 | 269 | 270 |
| AB039777(P7) | F   | P   | A   | A   | I   | D   | M   | L   | Y   | T   | D   | P   | N   | E   | S   | I   | V   | V   | Q   | P   | Q   | N   | G   | R   | C   | T   | L   | D   | G   | T   |
| LC122916(P7) | F   | P   | A   | A   | I   | D   | M   | L   | Y   | T   | D   | P   | N   | E   | S   | I   | V   | V   | Q   | P   | Q   | N   | G   | R   | C   | T   | L   | D   | G   | T   |
| MK956199(P7) | F   | P   | A   | P   | I   | D   | M   | L   | Y   | T   | D   | P   | N   | E   | G   | I   | V   | V   | Q   | P   | Q   | N   | G   | R   | C   | T   | L   | D   | G   | T   |
| MH791993(P7) | F   | P   | A   | P   | I   | D   | M   | L   | Y   | T   | D   | P   | N   | E   | A   | I   | V   | V   | Q   | P   | Q   | N   | G   | R   | C   | T   | L   | D   | G   | T   |
| JX989075(P6) | F   | P   | A   | P   | I   | D   | M   | L   | Y   | T   | D   | P   | N   | E   | T   | I   | V   | V   | Q   | P   | Q   | N   | G   | R   | C   | T   | L   | D   | G   | T   |
|              | 271 | 272 | 273 | 274 | 275 | 276 | 277 | 278 | 279 | 280 | 281 | 282 | 283 | 284 | 285 | 286 | 287 | 288 | 289 | 290 | 291 | 292 | 293 | 294 | 295 | 296 | 297 | 298 | 299 | 300 |
| AB039777(P7) | L   | Q   | G   | T   | T   | Q   | L   | V   | P   | T   | Q   | I   | C   | A   | F   | R   | G   | T   | L   | I   | S   | Q   | T   | A   | R   | A   | A   | D   | S   | T   |
| LC122916(P7) | L   | Q   | G   | T   | T   | Q   | L   | V   | P   | T   | Q   | I   | C   | A   | F   | R   | G   | T   | L   | I   | S   | Q   | N   | A   | R   | A   | A   | D   | L   | T   |
| MK956199(P7) | L   | Q   | G   | T   | T   | Q   | L   | V   | P   | T   | Q   | I   | C   | A   | F   | R   | G   | T   | L   | I   | G   | Q   | T   | S   | R   | S   | S   | D   | S   | T   |
| MH791993(P7) | L   | Q   | G   | T   | T   | Q   | L   | V   | P   | T   | Q   | I   | C   | S   | F   | R   | G   | T   | L   | I   | S   | Q   | T   | S   | R   | S   | A   | D   | S   | T   |
| JX989075(P6) | L   | Q   | G   | T   | T   | Q   | L   | V   | P   | T   | Q   | I   | C   | S   | F   | R   | G   | T   | L   | I   | S   | Q   | T   | S   | R   | S   | A   | D   | S   | T   |
|              | 301 | 302 | 303 | 304 | 305 | 306 | 307 | 308 | 309 | 310 | 311 | 312 | 313 | 314 | 315 | 316 | 317 | 318 | 319 | 320 | 321 | 322 | 323 | 324 | 325 | 326 | 327 | 328 | 329 | 330 |
| AB039777(P7) | D   | S   | P   | Q   | R   | A   | R   | D   | H   | P   | L   | H   | V   | Q   | V   | K   | N   | L   | G   | G   | T   | Q   | Y   | D   | P   | T   | D   | D   | I   | P   |
| LC122916(P7) | D   | S   | P   | Q   | R   | A   | R   | N   | H   | P   | L   | H   | V   | Q   | V   | K   | N   | L   | D   | G   | T   | Q   | Y   | D   | P   | T   | D   | D   | I   | P   |
| MK956199(P7) | D   | S   | A   | P   | R   | R   | R   | D   | H   | P   | L   | H   | V   | Q   | L   | K   | N   | L   | D   | G   | T   | Q   | Y   | D   | P   | T   | D   | E   | V   | P   |
| MH791993(P7) | D   | S   | A   | P   | R   | V   | R   | N   | H   | P   | L   | H   | V   | Q   | L   | K   | N   | L   | D   | G   | T   | P   | Y   | D   | P   | T   | D   | E   | V   | P   |
| JX989075(P6) | D   | S   | A   | P   | R   | V   | R   | N   | H   | P   | L   | H   | V   | Q   | L   | K   | N   | L   | D   | G   | T   | P   | Y   | D   | P   | T   | D   | E   | V   | P   |
|              | 331 | 332 | 333 | 334 | 335 | 336 | 337 | 338 | 339 | 340 | 341 | 342 | 343 | 344 | 345 | 346 | 347 | 348 | 349 | 350 | 351 | 352 | 353 | 354 | 355 | 356 | 357 | 358 | 359 | 360 |
| AB039777(P7) | A   | V   | L   | G   | A   | I   | D   | F   | K   | G   | T   | V   | F   | G   | V   | A   | S   | Q   | R   | D   | V   | S   | G   | P   | Q   | E   | Q   | G   | H   | Y   |
| LC122916(P7) | A   | V   | L   | G   | A   | I   | D   | F   | K   | G   | T   | V   | F   | G   | V   | A   | S   | Q   | R   | D   | V   | S   | G   | T   | Q   | E   | Q   | G   | H   | Y   |

|              |     |     |     |     |     |     |     |     |     |     |     |     |     |     |     |     |     |     |     |     |     |     |     |     |     |     |     |     |     |     |
|--------------|-----|-----|-----|-----|-----|-----|-----|-----|-----|-----|-----|-----|-----|-----|-----|-----|-----|-----|-----|-----|-----|-----|-----|-----|-----|-----|-----|-----|-----|-----|
| MK956199(P7) | A   | V   | L   | G   | A   | I   | D   | F   | K   | G   | T   | V   | F   | G   | V   | A   | S   | Q   | R   | D   | V   | S   | G   | Q   | Q   | V   | G   | -   | -   | -   |
| MH791993(P7) | A   | V   | L   | G   | A   | I   | D   | F   | K   | G   | T   | V   | F   | G   | I   | A   | S   | Q   | R   | N   | T   | T   | G   | S   | S   | I   | G   | -   | -   | -   |
| JX989075(P6) | A   | V   | L   | G   | A   | I   | D   | F   | K   | G   | T   | V   | F   | G   | V   | A   | S   | Q   | R   | N   | T   | T   | G   | S   | S   | V   | G   | -   | -   | -   |
|              | 361 | 362 | 363 | 364 | 365 | 366 | 367 | 368 | 369 | 370 | 371 | 372 | 373 | 374 | 375 | 376 | 377 | 378 | 379 | 380 | 381 | 382 | 383 | 384 | 385 | 386 | 387 | 388 | 389 | 390 |
| AB039777(P7) | A   | T   | R   | A   | H   | E   | A   | H   | I   | D   | T   | T   | D   | P   | K   | Y   | A   | P   | K   | L   | G   | T   | I   | L   | I   | K   | S   | E   | S   | N   |
| LC122916(P7) | A   | T   | R   | A   | H   | E   | A   | H   | I   | D   | T   | T   | D   | P   | K   | Y   | A   | P   | K   | L   | G   | T   | I   | L   | I   | K   | S   | E   | S   | T   |
| MK956199(P7) | A   | T   | R   | A   | H   | E   | V   | H   | I   | N   | T   | T   | D   | P   | R   | Y   | T   | P   | K   | L   | G   | S   | I   | L   | M   | H   | S   | E   | S   | D   |
| MH791993(P7) | A   | T   | R   | A   | H   | E   | V   | H   | I   | D   | T   | T   | N   | P   | R   | Y   | T   | P   | K   | L   | G   | S   | V   | L   | M   | Y   | S   | E   | S   | N   |
| JX989075(P6) | A   | T   | R   | A   | H   | E   | V   | H   | I   | D   | T   | T   | N   | P   | R   | Y   | T   | P   | K   | L   | G   | S   | V   | L   | M   | H   | S   | E   | S   | S   |
|              | 391 | 392 | 393 | 394 | 395 | 396 | 397 | 398 | 399 | 400 | 401 | 402 | 403 | 404 | 405 | 406 | 407 | 408 | 409 | 410 | 411 | 412 | 413 | 414 | 415 | 416 | 417 | 418 | 419 | 420 |
| AB039777(P7) | D   | F   | T   | T   | N   | Q   | P   | I   | R   | F   | T   | P   | V   | G   | M   | G   | D   | N   | N   | W   | R   | Q   | W   | E   | L   | P   | D   | Y   | S   | G   |
| LC122916(P7) | D   | F   | T   | T   | N   | Q   | P   | I   | R   | F   | T   | P   | V   | G   | M   | G   | D   | N   | N   | W   | R   | Q   | W   | E   | L   | P   | D   | Y   | S   | G   |
| MK956199(P7) | D   | F   | V   | T   | G   | Q   | P   | V   | R   | F   | T   | P   | I   | G   | M   | G   | D   | N   | D   | W   | H   | Q   | W   | E   | L   | P   | D   | Y   | S   | G   |
| MH791993(P7) | D   | F   | D   | D   | G   | Q   | P   | T   | R   | F   | T   | P   | I   | G   | M   | G   | A   | D   | D   | W   | R   | Q   | W   | E   | L   | P   | E   | Y   | S   | G   |
| JX989075(P6) | D   | F   | D   | D   | G   | Q   | P   | T   | R   | F   | T   | P   | I   | G   | M   | G   | A   | D   | D   | W   | H   | Q   | W   | E   | L   | P   | E   | Y   | S   | G   |
|              | 421 | 422 | 423 | 424 | 425 | 426 | 427 | 428 | 429 | 430 | 431 | 432 | 433 | 434 | 435 | 436 | 437 | 438 | 439 | 440 | 441 | 442 | 443 | 444 | 445 | 446 | 447 | 448 | 449 | 450 |
| AB039777(P7) | R   | L   | T   | L   | N   | M   | N   | L   | A   | P   | A   | V   | S   | P   | S   | F   | P   | G   | E   | R   | I   | L   | F   | F   | R   | S   | I   | V   | P   | S   |
| LC122916(P7) | S   | L   | T   | L   | N   | M   | N   | L   | A   | P   | A   | V   | S   | P   | S   | F   | P   | G   | E   | R   | I   | L   | F   | F   | R   | S   | I   | V   | P   | S   |
| MK956199(P7) | R   | L   | T   | L   | N   | M   | N   | L   | A   | P   | A   | V   | A   | P   | A   | F   | P   | G   | E   | R   | I   | L   | F   | F   | R   | S   | I   | V   | P   | S   |
| MH791993(P7) | H   | L   | T   | L   | N   | M   | N   | L   | A   | P   | A   | V   | A   | P   | A   | F   | P   | G   | E   | R   | I   | L   | F   | F   | R   | S   | V   | V   | P   | S   |
| JX989075(P6) | H   | L   | T   | L   | N   | M   | N   | L   | A   | P   | A   | V   | A   | P   | A   | F   | P   | G   | E   | R   | I   | L   | F   | F   | R   | S   | V   | V   | P   | S   |
|              | 451 | 452 | 453 | 454 | 455 | 456 | 457 | 458 | 459 | 460 | 461 | 462 | 463 | 464 | 465 | 466 | 467 | 468 | 469 | 470 | 471 | 472 | 473 | 474 | 475 | 476 | 477 | 478 | 479 | 480 |
| AB039777(P7) | A   | G   | G   | Y   | G   | S   | G   | Y   | I   | D   | C   | L   | I   | P   | Q   | E   | W   | V   | Q   | H   | F   | Y   | Q   | E   | A   | A   | P   | S   | Q   | S   |
| LC122916(P7) | A   | G   | G   | Y   | G   | S   | G   | Y   | I   | D   | C   | L   | I   | P   | Q   | E   | W   | V   | Q   | H   | F   | Y   | Q   | E   | A   | A   | P   | S   | Q   | S   |

[illegible]
